# Supplementary material
Source: PubMed Central journal article supplement (PMC3621360)
Supplement: Supp_Fig1.pdf [file Supp_Fig1.pdf]

## Supplementary Data

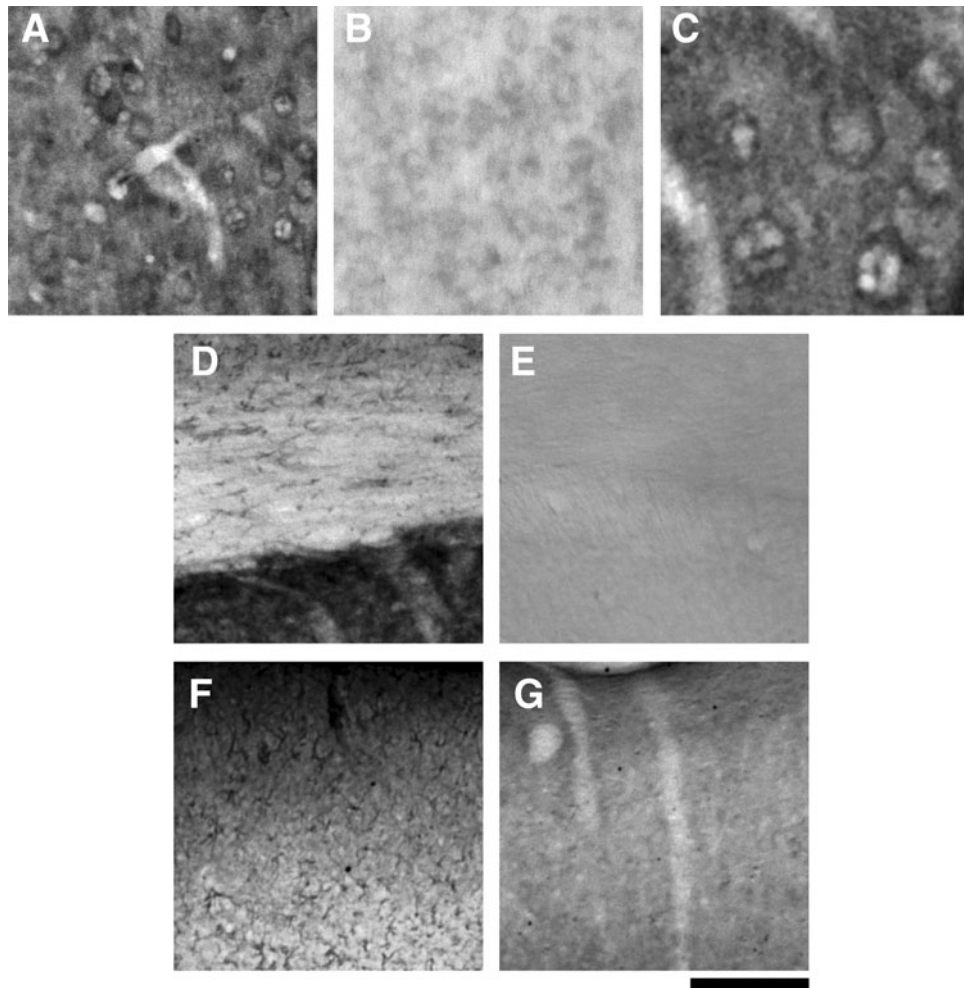

**SUPPLEMENTARY FIG. S1.** Representative photomicrographs of sections checking specificity of the antibodies used. All immunohistochemistry was processed at the same time. The photographs show that all immunostaining is eliminated when the slices are processed without anti- $A_{1}$ , anti- $A_{2A}$ , or anti-GFAP [negative controls: (B, E, G)]. (A–C)  $A_{1}$ -immunostaining in S2; (D, E)  $A_{2A}$ -immunostaining in border between the Str and neocortex; (F, G) GFAP-immunostaining in Cg2. Scale bar: 75  $\mu\text{m}$  in (A, B); 35  $\mu\text{m}$  in (C); 200  $\mu\text{m}$  in (D–G). GFAP, glial fibrillary acidic protein; Cg2, cingulate cortex; S2, secondary somatosensory cortex; Str, striatum.
