# Supplementary material
Source: PubMed Central journal article supplement (PMC3621360)
Supplement: Supp_Fig2.pdf [file Supp_Fig2.pdf]

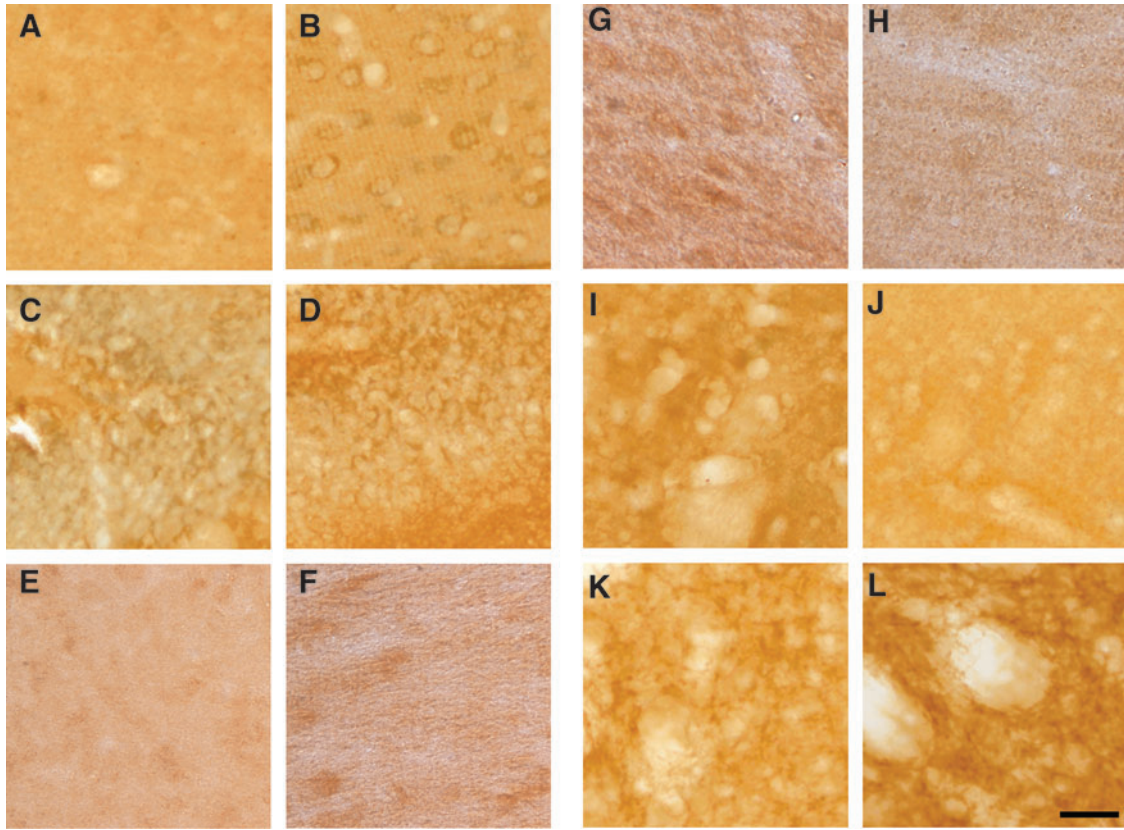

**SUPPLEMENTARY FIG. S2.** Representative photomicrographs of  $A_1$ -(**A-J**) and  $A_{2A}$ -(**K, L**) immunostained sections of the two experimental groups. (**A, C, E, G, I, K**) Pregnant rat with drug-free tap water; (**B, D, F, H, J, L**) pregnant rat taking caffeine 1g/L.  $A_1$ -ir: (**A, B**) Cg2; (**C, D**) DG; (**E, F**) mPOA; (**G, H**) S2; (**I, J**) Str;  $A_{2A}$ -ir: (**K, L**) Str. Scale bar 25  $\mu$ m. DG, dentate gyrus; mPOA, medial preoptic area; ir, immunoreactivity.
