# Supplementary material
Source: PubMed Central journal article supplement (PMC3621360)
Supplement: Supp_Fig3.pdf [file Supp_Fig3.pdf]

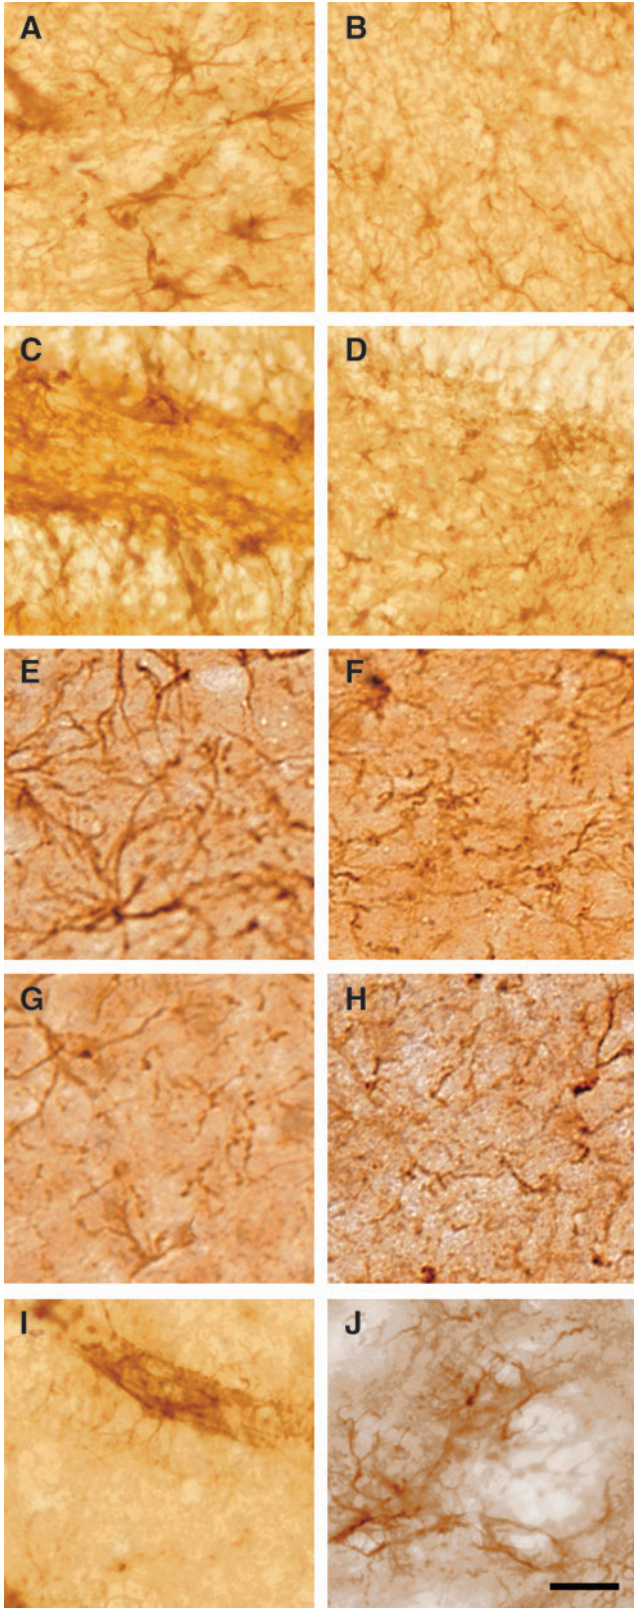

**SUPPLEMENTARY FIG. S3.** Representative photomicrographs of GFAP-immunostained sections of the two experimental groups. (A, C, E, G, I) Pregnant rat with drug-free tap water; (B, D, F, H, J) pregnant rat taking caffeine 1g/L. (A, B) Cg2; (C, D) DG; (E, F) mPOA; (G, H) S2; (I, J) Str. Scale bar 25  $\mu$ m.
