# Supplementary material
Source: PubMed Central journal article supplement (PMC3621360)
Supplement: Supp_Fig4.pdf [file Supp_Fig4.pdf]

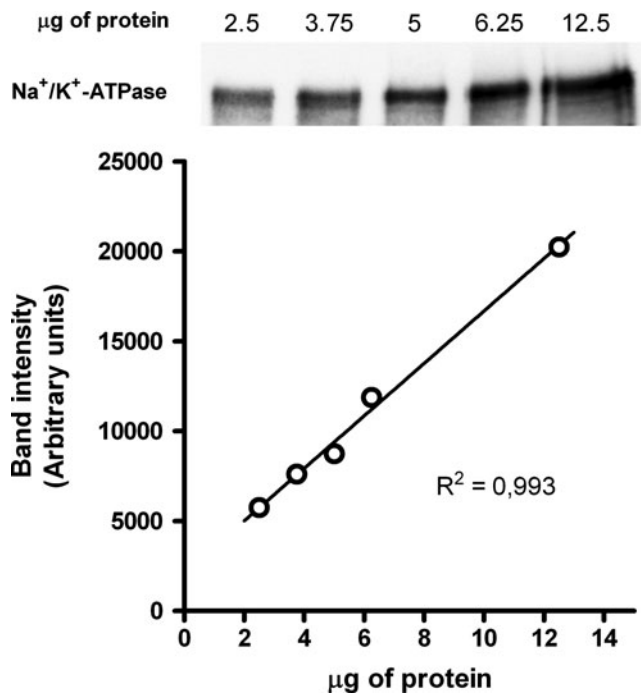

**SUPPLEMENTARY FIG. S4.** Western blot comparing the immunoreactivity of Na<sup>+</sup>/K<sup>+</sup>-ATPase, a specific plasmatic membrane marker, in membranes from the rat cerebral cortex of pregnant water rats. The gel was loaded with 5 different amounts of protein ranging from 2.5 to 12.5 µg (fivefold increase), electrophoresed, and transferred to nitrocellulose membranes as indicated in the Methods section. Membranes were probed with monoclonal Na<sup>+</sup>/K<sup>+</sup>-ATPase antibody (1:2000; Abcam), and the band intensity was quantified following described procedures. A representative image of different preparations is shown. It is evident that the intensity of bands identified as the Na<sup>+</sup>/K<sup>+</sup>-ATPase increases as the quantity of loaded protein increases. Band quantification shows a linear correlation with the amount of loaded protein. R<sup>2</sup> is shown in the figure.
