# Supplementary material
Source: PubMed Central journal article supplement (PMC3621360)
Supplement: Supp_Table.pdf [file Supp_Table.pdf]

SUPPLEMENTARY TABLE S1. MEAN VALUES, MEAN  $\pm$  STANDARD ERROR OF THE MEAN (ARBITRARY UNITS), OF THE IMMUNOHISTOCHEMICAL PARAMETERS (STAINING INTENSITY AND PERCENTAGE OF THE SURFACE AREA OCCUPIED BY STAINING), WESTERN BLOT ASSAY, AND NUMBER OF CELLS (HISTOLOGICAL NISSL STAINING AND IMMUNOHISTOCHEMICAL STAINING WITH ANTINEURONAL NUCLEI, WHICH REACT WITH MOST NEURONAL CELL TYPES BY ANALYZED BRAIN REGIONS)

| Brain region                   | Analysis                       | Parameter                      | Analyzed protein    | Mean $\pm$ SEM in PW | Mean $\pm$ SEM in PC | p Value summary |
|--------------------------------|--------------------------------|--------------------------------|---------------------|----------------------|----------------------|-----------------|
| Frontal                        | IHC (Cg2)                      | Protein density                | A <sub>1</sub> -Rs  | 59.9 $\pm$ 0.7       | 96.8 $\pm$ 0.8       | ***             |
|                                |                                |                                | A <sub>2A</sub> -Rs | —                    | —                    | —               |
|                                |                                |                                | GFAP                | 102.5 $\pm$ 1.0      | 90.8 $\pm$ 1.4       | ***             |
|                                |                                | % surface occupied by staining | A <sub>1</sub> -Rs  | 5.7 $\pm$ 0.7        | 13.1 $\pm$ 0.4       | ***             |
|                                |                                |                                | A <sub>2A</sub> -Rs | —                    | —                    | —               |
|                                |                                |                                | GFAP                | 11.9 $\pm$ 0.3       | 12.1 $\pm$ 0.2       | ns              |
|                                | WB                             | Protein density                | A <sub>1</sub> -Rs  | 0.35 $\pm$ 0.01      | 0.80 $\pm$ 0.03      | ***             |
|                                |                                |                                | A <sub>2A</sub> -Rs | 0.15 $\pm$ 0.02      | 0.07 $\pm$ 0.02      | ns              |
|                                |                                |                                | GFAP                | 0.91 $\pm$ 0.26      | 0.89 $\pm$ 0.10      | ns              |
|                                | Number of cells                | Nissl staining<br>NeuN-ir      |                     | 16.9 $\pm$ 0.4       | 9.5 $\pm$ 0.4        | ***             |
|                                |                                |                                |                     | 11.5 $\pm$ 0.4       | 9.5 $\pm$ 0.4        | ns              |
|                                | Hippocampus                    | IHC (DG)                       | Protein density     | A <sub>1</sub> -Rs   | 120.3 $\pm$ 1.3      | 141.8 $\pm$ 1.7 |
| A <sub>2A</sub> -Rs            |                                |                                |                     | —                    | —                    | —               |
| GFAP                           |                                |                                |                     | 126.3 $\pm$ 1.2      | 107.9 $\pm$ 3.5      | ***             |
| % surface occupied by staining |                                |                                | A <sub>1</sub> -Rs  | 16.79 $\pm$ 0.7      | 18.62 $\pm$ 0.35     | *               |
|                                |                                |                                | A <sub>2A</sub> -Rs | —                    | —                    | —               |
|                                |                                |                                | GFAP                | 15.2 $\pm$ 0.7       | 14.65 $\pm$ 0.38     | ns              |
| WB                             |                                | Protein density                | A <sub>1</sub> -Rs  | 0.85 $\pm$ 0.01      | 0.31 $\pm$ 0.13      | *               |
|                                |                                |                                | A <sub>2A</sub> -Rs | 0.93 $\pm$ 0.01      | 1.63 $\pm$ 0.05      | **              |
|                                |                                |                                | GFAP                | 1.27 $\pm$ 0.01      | 0.70 $\pm$ 0.14      | *               |
| Number of cells                |                                | Nissl staining<br>NeuN-ir      |                     | 10.12 $\pm$ 0.99     | 5.08 $\pm$ 0.58      | ***             |
|                                |                                |                                |                     | 1.8 $\pm$ 0.18       | 1.92 $\pm$ 0.22      | ns              |
| mPOA                           |                                | IHC                            | Protein density     | A <sub>1</sub> -Rs   | 109.2 $\pm$ 0.6      | 125.7 $\pm$ 0.2 |
|                                | A <sub>2A</sub> -Rs            |                                |                     | —                    | —                    | —               |
|                                | GFAP                           |                                |                     | 129.8 $\pm$ 0.98     | 136.2 $\pm$ 2.9      | ns              |
|                                | % surface occupied by staining |                                | A <sub>1</sub> -Rs  | 11.64 $\pm$ 0.4      | 13.88 $\pm$ 0.67     | *               |
|                                |                                |                                | A <sub>2A</sub> -Rs | —                    | —                    | —               |
|                                |                                |                                | GFAP                | 11.97 $\pm$ 0.37     | 13.19 $\pm$ 0.21     | *               |
|                                | WB                             | Protein density                | A <sub>1</sub> -Rs  | —                    | —                    | —               |
|                                |                                |                                | A <sub>2A</sub> -Rs | —                    | —                    | —               |
|                                |                                |                                | GFAP                | —                    | —                    | —               |
|                                | Number of cells                | Nissl staining<br>NeuN-ir      |                     | 22.62 $\pm$ 1.67     | 12.33 $\pm$ 1.22     | ***             |
|                                |                                |                                |                     | 11.62 $\pm$ 0.75     | 10.53 $\pm$ 0.55     | ns              |
|                                | S2                             | IHC                            | Protein density     | A <sub>1</sub> -Rs   | 119.3 $\pm$ 1.9      | 98.43 $\pm$ 0.3 |
| A <sub>2A</sub> -Rs            |                                |                                |                     | —                    | —                    | —               |
| GFAP                           |                                |                                |                     | 118.4 $\pm$ 0.5      | 136.9 $\pm$ 2.4      | ***             |
| % surface occupied by staining |                                |                                | A <sub>1</sub> -Rs  | 16.29 $\pm$ 0.29     | 14.00 $\pm$ 0.31     | ***             |
|                                |                                |                                | A <sub>2A</sub> -Rs | —                    | —                    | —               |
|                                |                                |                                | GFAP                | 6.8 $\pm$ 0.45       | 13.12 $\pm$ 0.16     | ***             |
| WB                             |                                | Protein density                | A <sub>1</sub> -Rs  | —                    | —                    | —               |
|                                |                                |                                | A <sub>2A</sub> -Rs | —                    | —                    | —               |
|                                |                                |                                | GFAP                | —                    | —                    | —               |
| Number of cells                |                                | Nissl staining<br>NeuN-ir      |                     | 13.27 $\pm$ 0.36     | 11.77 $\pm$ 0.38     | ns              |
|                                |                                |                                |                     | 7.88 $\pm$ 0.39      | 8.73 $\pm$ 0.45      | ns              |
| Str                            |                                | IHC                            | Protein density     | A <sub>1</sub> -Rs   | 117.3 $\pm$ 1.0      | 112.2 $\pm$ 0.6 |
|                                | A <sub>2A</sub> -Rs            |                                |                     | 118.5 $\pm$ 0.9      | 152.1 $\pm$ 3.1      | ***             |
|                                | GFAP                           |                                |                     | 78.28 $\pm$ 2.1      | 84.11 $\pm$ 1.5      | ns              |
|                                | % surface occupied by staining |                                | A <sub>1</sub> -Rs  | 17.21 $\pm$ 1.0      | 10.13 $\pm$ 0.29     | ***             |
|                                |                                |                                | A <sub>2A</sub> -Rs | 14.85 $\pm$ 0.36     | 16.62 $\pm$ 0.64     | *               |
|                                |                                |                                | GFAP                | 9.4 $\pm$ 0.35       | 12.72 $\pm$ 0.6      | **              |
|                                | WB                             | Protein density                | A <sub>1</sub> -Rs  | 0.21 $\pm$ 0.06      | 0.07 $\pm$ 0.01      | ns              |
|                                |                                |                                | A <sub>2A</sub> -Rs | 0.49 $\pm$ 0.02      | 1.00 $\pm$ 0.04      | **              |
|                                |                                |                                | GFAP                | 0.24 $\pm$ 0.01      | 0.82 $\pm$ 0.24      | **              |
|                                | Number of cells                | Nissl staining<br>NeuN-ir      |                     | 11.23 $\pm$ 0.37     | 11.85 $\pm$ 0.55     | ns              |
|                                |                                |                                |                     | 11.33 $\pm$ 0.85     | 9.00 $\pm$ 0.46      | ns              |

\* $p$ <0.05; \*\* $p$ <0.01; \*\*\* $p$ <0.001.

ns, not significant; PC, pregnant caffeine, PW, pregnant water; GFAP, glial fibrillary acidic protein; Cg2, cingulate cortex; S2, secondary somatosensory cortex; Str, striatum; DG, dentate gyrus; mPOA, medial preoptic area; NeuN, neuronal nuclei; ir, immunoreactivity; SEM, standard error of the mean; WB, Western blot.
